# Supplementary material for: RSAT peak-motifs: motif analysis in full-size ChIP-seq datasets
Source: PubMed Central journal article supplement — Nucleic Acids Res. 2011 Dec 8;40(4):e31. doi: 10.1093/nar/gkr1104 (PMC3287167; doi:10.1093/nar/gkr1104), 2011-12-08
Supplement: supp_gkr1104_nar-02210-met-n-2011-File009.pdf [file supp_gkr1104_nar-02210-met-n-2011-File009.pdf]

|          | Discovered Motif                |                                         |                           |                          | Best match in motif database | Possible mouse transcription factor | Algorithms | Comment                   |                                                                          |
|----------|---------------------------------|-----------------------------------------|---------------------------|--------------------------|------------------------------|-------------------------------------|------------|---------------------------|--------------------------------------------------------------------------|
|          | Forebrain                       | Midbrain                                | Heart                     | Limb                     |                              |                                     |            |                           |                                                                          |
| specific | Heart specific                  |                                         |                           | rvAGGCCA <sup>sm</sup>   |                              | NR4A2 (JASPAR)                      | Nr4a2      | oligo (6)                 | Expressed in heart at TS22                                               |
|          |                                 |                                         |                           | rswGATAAG <sup>zm</sup>  |                              | Gata1 (JASPAR)                      | Gata       | local (6); position (6)   |                                                                          |
|          |                                 |                                         |                           | CGCSGCGCG <sup>cg</sup>  |                              | Zfp161 (UniProbe)                   | Zfp161     | position_analysis (7)     | Expressed in CNS at TS17                                                 |
|          |                                 |                                         |                           | rvACTssAGT <sup>by</sup> |                              |                                     |            |                           |                                                                          |
| specific | Forebrain specific              | ryG <sup>tk</sup> kaATkAG <sup>ya</sup> |                           |                          |                              | V\$GSH2_01 (Transfac)               | Gsx2/Pax4  | local (6;7)               | Expressed in midbrain at TS16                                            |
|          |                                 | tyyAA <sup>tt</sup> ARC <sup>wb</sup>   |                           |                          |                              | V\$CHX10_01 (Transfac)              | Vsx2       | position (6); local (6)   | Expressed in brain at TS20                                               |
|          | Midbrain specific               |                                         | rrGGATTAg <sup>rr</sup>   |                          |                              | V\$OTX3_01 (Transfac)               | Dmbx1      | local (6); position (6)   | Expressed in limb and forebrain at TS22;                                 |
|          | Limb specific                   |                                         |                           | myCCATAAA <sup>wm</sup>  |                              | Hoxb/d9 (Uniprobe)                  | Hox9       | local (6;7); position (7) | Expression information for Hoxd9                                         |
| ↓        | Brain and limb E-box            | raCAGCT <sup>ty</sup>                   | rrCAGCT <sup>gy</sup>     |                          | yvSAGCT <sup>sbr</sup>       | V\$AP4_Q5 (Transfac)                | Tcfap4     | oligo (6)                 | Expressed in limb and forebrain at TS16; brain at TS21; heart at TS28    |
|          |                                 | syGGCAGCTGCC <sup>rs</sup>              | ssrCAkCTG <sup>yss</sup>  |                          | mmrCAGCTG <sup>ykk</sup>     | NHLH1 (JASPAR)                      | Nhlh1      | position (6); local (7)   | Neurod, a bHLH factor similar to NHLH1, is expressed at TS19 in the limb |
|          |                                 |                                         |                           |                          | rmACATCTG <sup>gww</sup>     | V\$RP58_01 (Transfac)               | Zfp238     | oligo (7); local (7)      | Expressed in forebrain at TS26                                           |
| generic  | Brain and limb                  | vhCTGCAG <sup>db</sup>                  | ssCTGCAG <sup>ss</sup>    |                          | rkCTGCAG <sup>my</sup>       | Zbtb3 (Uniprobe)                    | Zbtb3      | oligo (6)                 | Expressed in CNS at TS18                                                 |
|          | Midbrain and heart AC – repeats |                                         | caCACACa <sup>ca</sup>    | ACACACACA                |                              | Gm397 (UniProbe)                    | Zscan4c    |                           | No information about expression                                          |
|          | Midbrain, Heart, Limb           |                                         | awTTTAAAw <sup>t</sup>    | wwTTTAAAw <sup>w</sup>   | wTTTAAAw <sup>a</sup>        |                                     |            | oligo (6)                 |                                                                          |
|          | All tissues                     | ccCCCCtCCCC <sup>mc</sup>               | cyCCCCtCCCC <sup>mc</sup> | ccCCCCmCCC <sup>cs</sup> | ccCCCCmCCC <sup>cs</sup>     | Sp1 (JASPAR)                        | Sp1        | dyad; oligo (7)           | Expressed in CNS at TS17 and heart at TS24                               |
|          |                                 | ktrTTTTA <sup>ww</sup>                  | tyATTTTA <sup>ww</sup>    | ttATTTTA <sup>aw</sup>   | wwrTTTTA <sup>ww</sup>       | V\$MEF2_05 (Transfac)               | Mef2       | oligo (7)                 | Expressed in forebrain at TS22                                           |

**Legend**

|                                                                                          |
|------------------------------------------------------------------------------------------|
| potential TF is expressed at TS19 in the tissue                                          |
| potential TF is not expressed at any stage                                               |
| potential transcription factor is expressed in tissue at a different stage (see comment) |
